# Supplementary material for: Differential Diel Translation of Transcripts With Roles in the Transfer and Utilization of Iron-Sulfur Clusters in Arabidopsis
Source: Front Plant Sci. 2018 Nov 13;9:1641. doi: 10.3389/fpls.2018.01641 (PMC6243122; doi:10.3389/fpls.2018.01641)
Supplement: Supplementary file 7 [file Table_7.XLSX]

## Sheet: Sheet1
Supplementary Dataset 7. Translation Rate of Fe-S Cluster Assembly Proteins in Arabidopsis
			Translation State (TL)				Transcript Level (TX)				Protein Biosynthesis Rate (PBR)
			Average	Average	Average	Averages	Average	Average	Average	Average
TAIR ID	Short name	Localization	6am ZT0	12pm ZT6	6pm ZT12	12am ZT18	6am ZT0	12pm ZT6	6pm ZT12	12am ZT18	6am ZT0	12pm ZT6	6pm ZT12	12am ZT18
AT4G21090	ADX1/MDFX2	Mitochondria	2.20221	2.35991	2.21744	2.68538	564.175	280.139	326.288	393.44	1242.43	661.103	723.522	1056.54
AT4G05450	ADX2/MDFX1	Mitochondria	2.82985	2.83345	2.85469	3.15361	192.672	263.197	282.088	216.767	545.232	745.756	805.272	683.598
AT4G32360	ADXR/MFDR	Mitochondria	2.33976	2.6285	2.61998	2.42225	130.69	172.446	163.144	112.206	305.782	453.274	427.433	271.789
AT1G16700	Alpha-helical ferredoxin	Mitochondria	3.66304	3.24826	3.57148	3.96063	4576.41	5042.77	5293.48	5518.27	16763.6	16380.2	18905.6	21855.8
AT5G58270	ATM3/STA1/ABCB25	Cytosol	3.86466	3.99197	4.22393	4.03153	1398.83	1314.23	1323.37	1332.57	5405.99	5246.36	5589.81	5372.31
AT2G26060	CIA1/emb1345	Cytosol	3.14067	3.41935	3.29503	3.40609	1734.13	1398.83	1520.15	1675.06	5446.35	4783.07	5008.94	5705.42
AT5G18400	DRE2/CIAPIN1	Cytosol	3.19091	3.60802	3.50587	3.67174	354.588	250.732	324.034	522.758	1131.46	904.645	1136.02	1919.43
AT4G03240	FH/frataxin	Mitochondria	2.56413	2.26175	2.47919	2.68411	560.278	442.643	491.143	501.463	1436.63	1001.15	1217.64	1345.98
AT3G54900	GRXS14	Plastids	4.50777	3.609	3.894	4.6787	760.076	1038.29	439.586	388.023	3426.25	3747.2	1711.75	1815.44
AT3G15660	GRXS15	Mitochondria	2.9517	2.48765	2.77799	3.14431	1448.15	1408.55	1552.09	1398.83	4274.51	3503.99	4311.7	4398.34
AT2G38270	GRXS16	Plastids	3.14687	3.64236	3.82136	3.72346	843.357	1031.12	1038.29	955.426	2653.94	3755.72	3967.7	3557.49
AT4G04950	GRXS17	Cytosol	4.19537	3.69336	4.10015	4.26107	315.173	284.05	344.892	292.036	1322.27	1049.1	1414.11	1244.38
AT3G24430	HCF101	Plastids	3.7834	3.55242	3.64236	3.66098	4182.07	4389.98	4096	4269.94	15822.4	15595.1	14919.1	15632.2
AT4G37910	HSCA1/mtHSC70-1	Mitochondria	3.91335	3.88299	4.2146	4.17327	1978.24	1509.65	1795.29	1488.87	7741.54	5861.96	7566.42	6213.45
AT5G09590	HSCA2/mtHSC70-5	Mitochondria	4.27783	4.75836	4.91133	4.05732	424.612	484.382	613.109	272.479	1816.42	2304.86	3011.18	1105.53
AT5G06410	HSCB	Mitochondria	2.86499	2.52435	2.82108	2.95395	131.599	179.769	188.706	192.672	377.028	453.8	532.357	569.143
AT4G12130	IBA57	Mitochondria	3.60306	3.51611	3.97891	3.91615	128	101.829	133.436	84.4485	461.192	358.04	530.929	330.713
AT1G60990	IBA57.2	Plastids	3.96476	3.4471	3.2851	3.45442	300.246	216.767	233.941	221.322	1190.4	747.216	768.52	764.538
AT4G19540	INDH	Mitochondria	2.60002	2.66915	2.61929	2.41522	382.681	209.383	245.572	330.842	994.981	558.874	643.223	799.057
AT2G16710	ISCA2/ ISA1	Mitochondria	2.76995	2.08953	2.20735	2.83209	744.434	885.286	1260.69	1128.35	2062.04	1849.83	2782.79	3195.59
AT5G03905	ISCA4	Mitochondria	2.7901	2.30253	2.21633	2.2094	337.794	280.139	388.023	442.643	942.478	645.03	859.989	977.975
AT5G61220	ISD11	Mitochondria	3.39487	2.87243	2.91731	3.56685	1112.82	1024	1458.23	1160.07	3777.87	2941.37	4254.1	4137.81
AT4G22220	ISU1/IscU1	Mitochondria	4.79121	4.53289	4.37326	4.85253	1314.23	1640.59	1710.26	1488.87	6296.75	7436.62	7479.41	7224.77
AT5G55200	MGE1b	Mitochondria	3.17553	3.28719	3.22682	3.49971	75.5835	76.1093	74.028	76.6386	240.018	250.186	238.875	268.213
AT4G16440	NAR1/GOLLUM	Cytosol	3.4293	3.37549	3.14784	3.11919	401.707	315.173	362.039	393.44	1377.57	1063.86	1139.64	1227.21
AT5G50960	NBP35	Cytosol	3.76834	4.42738	4.29938	3.94638	442.643	544.958	560.278	608.874	1668.03	2412.73	2408.85	2402.85
AT5G65720	NFS1/NifS1	Mitochondria	3.9664	3.72529	3.76532	4.09473	689.784	504.951	439.586	541.193	2735.96	1881.09	1655.18	2216.04
AT1G08490	NFS2/CpNifS/CpSufS	Plastids	3.093	3.11568	3.18542	3.34095	481.036	512	526.394	548.748	1487.85	1595.23	1676.79	1833.34
AT4G01940	NFU1	Plastids	2.93403	2.3426	2.5353	3.02077	1168.14	1618	1675.06	1438.15	3427.36	3790.34	4246.78	4344.32
AT5G49940	NFU2/CnfU	Plastids	3.50405	3.12373	3.48654	3.65158	4803.93	4803.93	5256.91	5148.73	16833.2	15006.2	18328.4	18801
AT4G25910	NFU3	Plastids	1.68464	1.73412	1.6995	1.69596	4672.57	2538.92	2610.3	3191.46	7871.6	4402.8	4436.21	5412.58
AT3G20970	NFU4/NFU-III	Mitochondria	3.06042	2.98725	3.15196	3.89057	100.427	88.0347	91.1392	81.5719	307.348	262.981	287.267	317.361
AT1G10500	SUFA/CpIscA	Plastids	3.52697	2.94929	3.11482	3.60607	1520.15	2091.03	2005.85	1584.71	5361.54	6167.06	6247.87	5714.57
AT4G04770	SUFB/NAP1	Plastids	4.52202	4.21657	4.15793	4.32031	2778.33	2977.74	2241.11	2256.7	12563.6	12555.8	9318.38	9749.66
AT3G10670	SUFC/NAP7	Plastids	2.94025	3.49546	3.28792	3.51599	1323.37	1305.15	1389.16	1379.57	3891.04	4562.09	4567.46	4850.55
AT1G32500	SUFD/NAP6	Plastids	4.38555	4.84987	4.75473	4.36519	613.109	749.612	867.067	685.019	2688.82	3635.52	4122.67	2990.24
AT4G26500	SUFE1-BolA	Mitochondria	3.88487	3.83525	3.94088	3.84608	354.588	448.822	515.561	390.722	1377.53	1721.35	2031.76	1502.75
AT1G67810	SUFE2	Plastids	2.41629	3.45478	3.74095	3.02273	21.259	101.829	263.197	91.7731	51.3679	351.795	984.608	277.406
AT5G50210	SUFE3-NADA	Plastids	2.92662	3.70524	3.53651	3.44947	867.067	744.434	648.067	1082.39	2537.58	2758.31	2291.9	3733.66
TL indicates the translation state, calculated as described in methods and providing an estimate of the number of ribosomes bound per mRNA.
TX indicates mRNA transcript levels. Hybridization signal values were extracted using gcRMA.
